# Supplementary material for: Proteomic analysis reveals anticancer mechanisms of Bhallataka taila in inhibiting lung cancer progression and metastasis
Source: Royal Society of Chemistry journal article supplement (doi:10.1039/d4mo00156g), 2025-01-02
Supplement: d4mo00156g2.pdf [file d4mo00156g2.pdf]

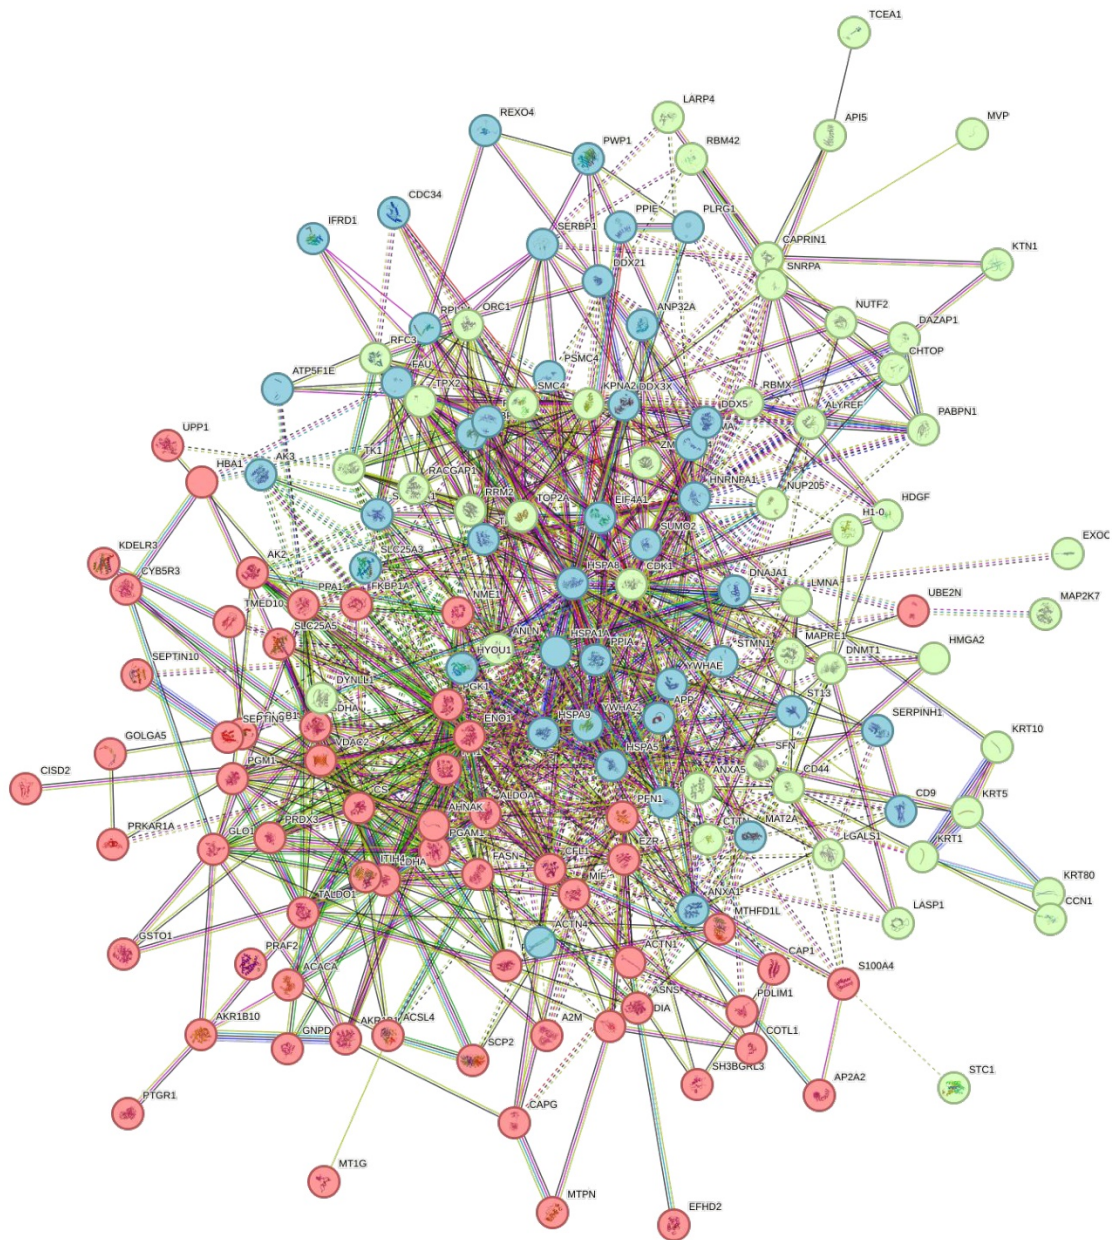

Supplementary figure 1: The protein-protein interaction network of altered proteins after Bhallataka taila treatment
