# Supplementary material for: Proteomic analysis reveals anticancer mechanisms of Bhallataka taila in inhibiting lung cancer progression and metastasis
Source: Royal Society of Chemistry journal article supplement (doi:10.1039/d4mo00156g), 2025-01-02
Supplement: d4mo00156g3.xlsx [file d4mo00156g3.xlsx]

## Sheet: 48hr
Supplementary table1: List of identified proteins and their corresponding fold change and p-values
Protien Accession	Description	Fold change	p-value
NP_005338.1	endoplasmic reticulum chaperone BiP precursor [Homo sapiens]	1.50656	0.00646677	Upregulated
NP_004125.3	stress-70 protein, mitochondrial precursor [Homo sapiens]	1.72848	0.044671	Upregulated
NP_001407.1	eukaryotic initiation factor 4A-I isoform 1 [Homo sapiens]	1.72572	0.0171253	Upregulated
NP_001347.3	ATP-dependent RNA helicase DDX3X isoform 1 [Homo sapiens]	1.52568	0.0210951	Upregulated
NP_005336.3	heat shock 70 kDa protein 1A [Homo sapiens]	3.51359	0.0160193	Upregulated
NP_001143.2	ADP/ATP translocase 2 [Homo sapiens]	1.51948	0.001239	Upregulated
NP_001058.2	DNA topoisomerase 2-alpha [Homo sapiens]	1.79917	0.0215849	Upregulated
NP_001171712.1	voltage-dependent anion-selective channel protein 2 isoform 1 [Homo sapiens]	1.56883	0.00190229	Upregulated
XP_005271451.1	hypoxia up-regulated protein 1 isoform X1 [Homo sapiens]	1.58651	1.04539e-05	Upregulated
NP_006494.1	26S proteasome regulatory subunit 6B isoform 1 [Homo sapiens]	1.61049	0.00390171	Upregulated
NP_005902.1	S-adenosylmethionine synthase isoform type-2 [Homo sapiens]	2.10109	0.00325148	Upregulated
XP_047274565.1	monofunctional C1-tetrahydrofolate synthase, mitochondrial isoform X1 [Homo sapiens]	1.73532	0.0418298	Upregulated
NP_004068.2	citrate synthase, mitochondrial precursor [Homo sapiens]	1.76935	0.000563396	Upregulated
XP_047292325.1	cAMP-dependent protein kinase type I-alpha regulatory subunit isoform X1 [Homo sapiens]	1.60259	0.00608491	Upregulated
NP_001530.1	dnaJ homolog subfamily A member 1 isoform 1 [Homo sapiens]	2.75582	0.00155172	Upregulated
NP_005879.1	phosphate carrier protein, mitochondrial isoform a precursor [Homo sapiens]	1.70159	0.0301545	Upregulated
NP_001387257.1	protein transport protein Sec61 subunit alpha isoform 1 isoform 2 [Homo sapiens]	1.71839	0.0051883	Upregulated
XP_006719119.1	alpha-2-macroglobulin isoform X1 [Homo sapiens]	3.8278	0.00750093	Upregulated
NP_001008389.1	CDGSH iron-sulfur domain-containing protein 2 [Homo sapiens]	1.65552	0.0488413	Upregulated
NP_006818.3	transmembrane emp24 domain-containing protein 10 precursor [Homo sapiens]	1.65007	0.0111739	Upregulated
XP_011510613.1	structural maintenance of chromosomes protein 4 isoform X1 [Homo sapiens]	1.83792	0.0155211	Upregulated
NP_003249.3	thymidine kinase, cytosolic isoform 1 [Homo sapiens]	2.88899	0.0305714	Upregulated
NP_006784.1	thioredoxin-dependent peroxide reductase, mitochondrial isoform a precursor [Homo sapiens]	1.59679	0.0497741	Upregulated
XP_047284158.1	la-related protein 4 isoform X1 [Homo sapiens]	2.11852	0.0234345	Upregulated
NP_001032583.1	dynein light chain 1, cytoplasmic [Homo sapiens]	1.76585	0.00262586	Upregulated
NP_002906.1	replication factor C subunit 3 isoform 1 [Homo sapiens]	1.7043	0.00367502	Upregulated
NP_000549.1	hemoglobin subunit alpha [Homo sapiens]	2.66588	0.0126275	Upregulated
NP_003146.1	stanniocalcin-1 precursor [Homo sapiens]	3.73366	0.0193753	Upregulated
NP_005848.2	CAAX prenyl protease 1 homolog [Homo sapiens]	1.54912	0.0496728	Upregulated
NP_001545.2	CCN family member 1 precursor [Homo sapiens]	4.74426	0.0298919	Upregulated
XP_024304726.1	rac GTPase-activating protein 1 isoform X1 [Homo sapiens]	1.71106	0.00423507	Upregulated
NP_001276737.1	alpha-crystallin B chain isoform 1 [Homo sapiens]	4.67861	0.0254292	Upregulated
NP_002209.2	inter-alpha-trypsin inhibitor heavy chain H4 isoform 1 precursor [Homo sapiens]	7.46365	0.0318119	Upregulated
NP_000475.1	amyloid-beta precursor protein isoform a precursor [Homo sapiens]	2.98049	0.0466956	Upregulated
XP_005259747.1	ubiquitin-conjugating enzyme E2 R1 isoform X1 [Homo sapiens]	1.7391	0.0357176	Upregulated
NP_001007246.1	interferon-related developmental regulator 1 isoform 1 [Homo sapiens]	2.22519	0.0319556	Upregulated
NP_006846.1	ER lumen protein-retaining receptor 3 isoform a [Homo sapiens]	1.61021	0.0233283	Upregulated
XP_016873759.1	neuroblast differentiation-associated protein AHNAK isoform X2 [Homo sapiens]	0.33174	0.0137497	Downregulated
NP_733821.1	lamin isoform A [Homo sapiens]	0.589435	0.000892952	Downregulated
NP_001093.1	alpha-actinin-1 isoform b [Homo sapiens]	0.650777	0.0328179	Downregulated
XP_016882820.1	alpha-actinin-4 isoform X3 [Homo sapiens]	0.60922	0.0046011	Downregulated
NP_001104547.1	ezrin [Homo sapiens]	0.627275	0.00752365	Downregulated
NP_006752.1	14-3-3 protein epsilon [Homo sapiens]	0.561226	0.0129972	Downregulated
XP_005251120.1	14-3-3 protein zeta/delta isoform X1 [Homo sapiens]	0.618855	0.00150636	Downregulated
NP_001419.1	alpha-enolase isoform 1 [Homo sapiens]	0.574412	0.0197174	Downregulated
NP_001152759.1	triosephosphate isomerase isoform 2 [Homo sapiens]	0.540965	0.000289573	Downregulated
NP_908930.1	fructose-bisphosphate aldolase A isoform 1 [Homo sapiens]	0.575966	0.000923042	Downregulated
NP_005498.1	cofilin-1 [Homo sapiens]	0.647278	0.00122377	Downregulated
NP_002620.1	phosphoglycerate mutase 1 isoform 1 [Homo sapiens]	0.630519	0.00690054	Downregulated
NP_001018077.1	plasminogen activator inhibitor 1 RNA-binding protein isoform 1 [Homo sapiens]	0.634238	0.00299249	Downregulated
NP_000282.1	phosphoglycerate kinase 1 [Homo sapiens]	0.577329	0.00772627	Downregulated
NP_001302466.1	L-lactate dehydrogenase B chain isoform LDHBx [Homo sapiens]	0.466029	0.000387648	Downregulated
NP_066953.1	peptidyl-prolyl cis-trans isomerase A isoform 1 [Homo sapiens]	0.58038	0.0167365	Downregulated
XP_047287445.1	adenylyl cyclase-associated protein 1 isoform X1 [Homo sapiens]	0.66905	0.0134348	Downregulated
NP_000691.1	annexin A1 [Homo sapiens]	0.538117	0.0305614	Downregulated
NP_005013.1	profilin-1 isoform 2 [Homo sapiens]	0.647399	0.0101867	Downregulated
NP_001136402.1	apoptosis inhibitor 5 isoform a [Homo sapiens]	0.57783	0.00878824	Downregulated
NP_001072989.1	kinectin isoform a [Homo sapiens]	0.5624	0.0111217	Downregulated
NP_002130.2	RNA-binding motif protein, X chromosome isoform 1 [Homo sapiens]	0.641022	0.0106197	Downregulated
NP_001138926.1	stathmin isoform b [Homo sapiens]	0.532971	0.0201059	Downregulated
NP_001106963.1	septin-9 isoform a [Homo sapiens]	0.52727	0.0137599	Downregulated
NP_006746.1	transaldolase [Homo sapiens]	0.529989	0.00485887	Downregulated
NP_003339.1	ubiquitin-conjugating enzyme E2 N [Homo sapiens]	0.663606	0.0164503	Downregulated
NP_003923.2	hsc70-interacting protein isoform 1 [Homo sapiens]	0.631615	0.012124	Downregulated
NP_001092755.1	prothymosin alpha isoform 1 [Homo sapiens]	0.411555	0.00171454	Downregulated
NP_005222.2	src substrate cortactin isoform a [Homo sapiens]	0.534972	0.028596	Downregulated
NP_001616.1	adenylate kinase 2, mitochondrial isoform a [Homo sapiens]	0.656551	0.0251302	Downregulated
NP_478059.1	phosphoserine aminotransferase isoform 1 [Homo sapiens]	0.631214	0.00136788	Downregulated
NP_001158886.1	L-lactate dehydrogenase A chain isoform 3 [Homo sapiens]	0.46629	0.0163751	Downregulated
XP_047301904.1	macrophage-capping protein isoform X1 [Homo sapiens]	0.638337	0.0020725	Downregulated
NP_036457.1	microtubule-associated protein RP/EB family member 1 [Homo sapiens]	0.63569	0.0221016	Downregulated
XP_024308119.1	long-chain-fatty-acid--CoA ligase 4 isoform X1 [Homo sapiens]	0.523879	0.0298056	Downregulated
NP_002624.2	phosphoglucomutase-1 isoform 1 [Homo sapiens]	0.506444	0.0398841	Downregulated
NP_006139.1	LIM and SH3 domain protein 1 isoform a [Homo sapiens]	0.552065	0.0279605	Downregulated
NP_001193541.1	chromatin target of PRMT1 protein isoform 2 [Homo sapiens]	0.440323	0.0365689	Downregulated
NP_937818.1	nucleoside diphosphate kinase A isoform a [Homo sapiens]	0.646474	0.0301639	Downregulated
NP_006747.1	transcription elongation factor A protein 1 isoform 1 [Homo sapiens]	0.636406	0.0366406	Downregulated
NP_001139247.1	peptidyl-prolyl cis-trans isomerase FKBP5 isoform 1 [Homo sapiens]	0.506122	0.0224405	Downregulated
XP_047295157.1	40S ribosomal protein S28 isoform X1 [Homo sapiens]	0.544047	0.0286025	Downregulated
NP_066952.1	inorganic pyrophosphatase [Homo sapiens]	0.644112	0.0102578	Downregulated
NP_001303303.1	malate dehydrogenase, peroxisomal isoform MDH1x [Homo sapiens]	0.631874	0.024308	Downregulated
NP_006296.1	acidic leucine-rich nuclear phosphoprotein 32 family member A [Homo sapiens]	0.381097	0.00725866	Downregulated
NP_002952.1	protein S100-A4 [Homo sapiens]	0.403429	0.0130413	Downregulated
NP_004634.1	polyadenylate-binding protein 2 isoform 1 [Homo sapiens]	0.666634	0.049193	Downregulated
NP_005773.3	THO complex subunit 4 [Homo sapiens]	0.566344	0.00532096	Downregulated
NP_001288172.1	rho GDP-dissociation inhibitor 1 isoform e [Homo sapiens]	0.54231	0.00104858	Downregulated
NP_112576.1	SH3 domain-binding glutamic acid-rich-like protein 3 [Homo sapiens]	0.559235	0.00588545	Downregulated
NP_001356315.1	nucleosome assembly protein 1-like 4 isoform 2 [Homo sapiens]	0.617301	0.0233002	Downregulated
NP_066972.1	coactosin-like protein [Homo sapiens]	0.630422	0.0450509	Downregulated
NP_054861.2	ADP-sugar pyrophosphatase isoform 1 [Homo sapiens]	0.437667	0.00990105	Downregulated
NP_066272.1	PDZ and LIM domain protein 1 [Homo sapiens]	0.591327	0.0292862	Downregulated
NP_004485.1	hepatoma-derived growth factor isoform a [Homo sapiens]	0.618409	0.0137845	Downregulated
NP_665807.1	myotrophin [Homo sapiens]	0.587664	0.0436825	Downregulated
NP_000792.1	peptidyl-prolyl cis-trans isomerase FKBP1A isoform a [Homo sapiens]	0.482241	0.0266506	Downregulated
NP_008868.3	small ubiquitin-related modifier 2 isoform a precursor [Homo sapiens]	0.62791	0.0140539	Downregulated
NP_077305.2	EF-hand domain-containing protein D2 [Homo sapiens]	0.667336	0.00820582	Downregulated
NP_004587.1	U1 small nuclear ribonucleoprotein A [Homo sapiens]	0.655717	0.00519529	Downregulated
NP_001288196.1	metallothionein-1G isoform 2 [Homo sapiens]	0.21472	0.0130039	Downregulated
NP_001308427.1	septin-10 isoform 4 [Homo sapiens]	0.490893	0.0399456	Downregulated
NP_001287847.1	high mobility group protein HMGI-C isoform c [Homo sapiens]	0.433388	0.044862	Downregulated
NP_001349703.1	uridine phosphorylase 1 isoform a [Homo sapiens]	0.45824	0.00999457	Downregulated
XP_047286017.1	peptidyl-prolyl cis-trans isomerase E isoform X1 [Homo sapiens]	0.647782	0.0166659	Downregulated
NP_001988.1	FAU ubiquitin-like and ribosomal protein S30 precursor [Homo sapiens]	0.552752	0.00537542	Downregulated
NP_004823.1	glutathione S-transferase omega-1 isoform 1 [Homo sapiens]	0.506251	0.0256441	Downregulated
NP_005309.1	histone H1.0 [Homo sapiens]	0.532479	0.000592348	Downregulated
NP_005787.1	nuclear transport factor 2 [Homo sapiens]	0.514671	0.0341434	Downregulated
XP_047280795.1	selenide, water dikinase 1 isoform X1 [Homo sapiens]	0.620601	0.0496514	Downregulated
NP_006699.2	lactoylglutathione lyase [Homo sapiens]	0.582403	0.0498713	Downregulated
NP_036344.2	prostaglandin reductase 1 isoform 1 [Homo sapiens]	0.634008	0.0107967	Downregulated
NP_002406.1	macrophage migration inhibitory factor [Homo sapiens]	0.361557	0.0213109	Downregulated
NP_064695.3	aldo-keto reductase family 1 member B10 [Homo sapiens]	0.509006	0.00243954	Downregulated
NP_001275727.1	mapk-regulated corepressor-interacting protein 1 isoform 1 [Homo sapiens]	0.391054	0.0314285	Downregulated
NP_005104.4	golgin subfamily A member 5 [Homo sapiens]	0.659888	0.00653663	Downregulated
XP_005268733.1	keratin, type II cytoskeletal 80 isoform X1 [Homo sapiens]	0.33462	0.0128885	Downregulated

## Sheet: 24hr
Protien Accession	Description	Fold change	p-value
NP_006588.1	heat shock cognate 71 kDa protein isoform 1 [Homo sapiens]	1.53188	0.047714	Upregulated
NP_005338.1	endoplasmic reticulum chaperone BiP precursor [Homo sapiens]	1.56374	0.0111448	Upregulated
NP_001407.1	eukaryotic initiation factor 4A-I isoform 1 [Homo sapiens]	1.63059	0.00433555	Upregulated
NP_001347.3	ATP-dependent RNA helicase DDX3X isoform 1 [Homo sapiens]	1.56443	0.0169627	Upregulated
NP_005336.3	heat shock 70 kDa protein 1A [Homo sapiens]	4.00594	0.00934969	Upregulated
NP_001058.2	DNA topoisomerase 2-alpha [Homo sapiens]	2.00598	0.0139093	Upregulated
NP_005902.1	S-adenosylmethionine synthase isoform type-2 [Homo sapiens]	2.02765	0.00338771	Upregulated
XP_047292325.1	cAMP-dependent protein kinase type I-alpha regulatory subunit isoform X1 [Homo sapiens]	1.56445	0.00179705	Upregulated
NP_001530.1	dnaJ homolog subfamily A member 1 isoform 1 [Homo sapiens]	2.39855	0.00178349	Upregulated
NP_001307540.1	importin subunit alpha-1 [Homo sapiens]	2.61553	0.0403694	Upregulated
XP_011510613.1	structural maintenance of chromosomes protein 4 isoform X1 [Homo sapiens]	1.6852	0.00744988	Upregulated
NP_003249.3	thymidine kinase, cytosolic isoform 1 [Homo sapiens]	2.80717	0.0275349	Upregulated
NP_001032583.1	dynein light chain 1, cytoplasmic [Homo sapiens]	1.55697	0.00116219	Upregulated
NP_002906.1	replication factor C subunit 3 isoform 1 [Homo sapiens]	1.53896	0.0164943	Upregulated
NP_000549.1	hemoglobin subunit alpha [Homo sapiens]	2.70745	0.0262722	Upregulated
NP_003146.1	stanniocalcin-1 precursor [Homo sapiens]	4.30029	0.00712123	Upregulated
NP_001545.2	CCN family member 1 precursor [Homo sapiens]	4.03505	0.025869	Upregulated
XP_024304726.1	rac GTPase-activating protein 1 isoform X1 [Homo sapiens]	2.07745	0.000517289	Upregulated
XP_006722863.1	dual specificity mitogen-activated protein kinase kinase 7 isoform X1 [Homo sapiens]	1.57997	0.035827	Upregulated
XP_016873759.1	neuroblast differentiation-associated protein AHNAK isoform X2 [Homo sapiens]	0.492953	0.015864	Downregulated
NP_001419.1	alpha-enolase isoform 1 [Homo sapiens]	0.638514	0.0303056	Downregulated
NP_001152759.1	triosephosphate isomerase isoform 2 [Homo sapiens]	0.657366	0.00010651	Downregulated
NP_001193943.1	serpin H1 precursor [Homo sapiens]	0.636618	0.000193563	Downregulated
NP_000282.1	phosphoglycerate kinase 1 [Homo sapiens]	0.574659	0.00310421	Downregulated
NP_001302466.1	L-lactate dehydrogenase B chain isoform LDHBx [Homo sapiens]	0.59151	0.000888948	Downregulated
NP_004095.4	fatty acid synthase [Homo sapiens]	0.537054	0.0255394	Downregulated
NP_066953.1	peptidyl-prolyl cis-trans isomerase A isoform 1 [Homo sapiens]	0.651778	0.0336616	Downregulated
NP_942131.1	acetyl-CoA carboxylase 1 isoform 1 [Homo sapiens]	0.567097	0.0330751	Downregulated
NP_001072989.1	kinectin isoform a [Homo sapiens]	0.607068	0.0152601	Downregulated
NP_001145.1	annexin A5 [Homo sapiens]	0.662467	0.0407026	Downregulated
NP_001106963.1	septin-9 isoform a [Homo sapiens]	0.662948	0.0377759	Downregulated
NP_006746.1	transaldolase [Homo sapiens]	0.66107	0.00406507	Downregulated
NP_001158886.1	L-lactate dehydrogenase A chain isoform 3 [Homo sapiens]	0.588011	0.0289297	Downregulated
NP_001180197.1	echinoderm microtubule-associated protein-like 2 isoform 1 [Homo sapiens]	0.662058	0.0277392	Downregulated
XP_047301904.1	macrophage-capping protein isoform X1 [Homo sapiens]	0.665165	0.00525872	Downregulated
XP_024308119.1	long-chain-fatty-acid--CoA ligase 4 isoform X1 [Homo sapiens]	0.401981	0.0196748	Downregulated
NP_002624.2	phosphoglucomutase-1 isoform 1 [Homo sapiens]	0.540051	0.0446522	Downregulated
NP_059447.2	major vault protein isoform 1 [Homo sapiens]	0.665705	0.00791167	Downregulated
NP_001139247.1	peptidyl-prolyl cis-trans isomerase FKBP5 isoform 1 [Homo sapiens]	0.396738	0.0135328	Downregulated
NP_066952.1	inorganic pyrophosphatase [Homo sapiens]	0.669418	0.00940972	Downregulated
NP_002952.1	protein S100-A4 [Homo sapiens]	0.35249	0.0106536	Downregulated
XP_005268405.1	glucosamine-6-phosphate isomerase 1 isoform X1 [Homo sapiens]	0.659513	0.00669528	Downregulated
NP_054861.2	ADP-sugar pyrophosphatase isoform 1 [Homo sapiens]	0.601082	0.0152746	Downregulated
NP_665807.1	myotrophin [Homo sapiens]	0.582906	0.0279653	Downregulated
NP_001288196.1	metallothionein-1G isoform 2 [Homo sapiens]	0.197452	0.0119616	Downregulated
NP_001349703.1	uridine phosphorylase 1 isoform a [Homo sapiens]	0.502956	0.00677462	Downregulated
XP_047286017.1	peptidyl-prolyl cis-trans isomerase E isoform X1 [Homo sapiens]	0.661944	0.0183188	Downregulated
NP_004823.1	glutathione S-transferase omega-1 isoform 1 [Homo sapiens]	0.574308	0.0351435	Downregulated
NP_005309.1	histone H1.0 [Homo sapiens]	0.51224	0.000369708	Downregulated
NP_005787.1	nuclear transport factor 2 [Homo sapiens]	0.59407	0.0357799	Downregulated
NP_057366.2	GTP:AMP phosphotransferase AK3, mitochondrial isoform a [Homo sapiens]	0.656945	0.0249266	Downregulated
NP_002406.1	macrophage migration inhibitory factor [Homo sapiens]	0.484475	0.0317408	Downregulated
NP_064695.3	aldo-keto reductase family 1 member B10 [Homo sapiens]	0.569257	0.0045539	Downregulated
XP_005253871.1	CD9 antigen isoform X1 [Homo sapiens]	0.65143	0.0398772	Downregulated
XP_005268733.1	keratin, type II cytoskeletal 80 isoform X1 [Homo sapiens]	0.409882	0.0144964	Downregulated

## Sheet: 12hr
Protien Accession	Description	Fold change	p-value
NP_005336.3	heat shock 70 kDa protein 1A [Homo sapiens]	1.50591	0.0183713	Upregulated
NP_006112.3	keratin, type II cytoskeletal 1 [Homo sapiens]	1.97273	0.00695763	Upregulated
NP_001058.2	DNA topoisomerase 2-alpha [Homo sapiens]	1.67643	0.0241737	Upregulated
NP_006133.1	14-3-3 protein sigma [Homo sapiens]	1.65867	0.00896941	Upregulated
NP_001366295.1	keratin, type I cytoskeletal 10 isoform 2 [Homo sapiens]	2.8513	0.0133842	Upregulated
NP_005902.1	S-adenosylmethionine synthase isoform type-2 [Homo sapiens]	1.78652	0.0173313	Upregulated
XP_047282915.1	caprin-1 isoform X1 [Homo sapiens]	1.50098	0.00320094	Upregulated
NP_001530.1	dnaJ homolog subfamily A member 1 isoform 1 [Homo sapiens]	1.73973	0.0198371	Upregulated
NP_001307540.1	importin subunit alpha-1 [Homo sapiens]	2.34476	0.0436392	Upregulated
XP_006719119.1	alpha-2-macroglobulin isoform X1 [Homo sapiens]	3.40705	0.0134885	Upregulated
NP_000415.2	keratin, type II cytoskeletal 5 [Homo sapiens]	3.1075	0.00851272	Upregulated
NP_001159403.1	ribonucleoside-diphosphate reductase subunit M2 isoform 1 [Homo sapiens]	1.52709	0.0154811	Upregulated
NP_001124295.1	DNA (cytosine-5)-methyltransferase 1 isoform a [Homo sapiens]	1.92821	0.0353153	Upregulated
NP_000549.1	hemoglobin subunit alpha [Homo sapiens]	3.42475	0.00971058	Upregulated
NP_003146.1	stanniocalcin-1 precursor [Homo sapiens]	1.89202	0.0265187	Upregulated
NP_001545.2	CCN family member 1 precursor [Homo sapiens]	2.09527	0.0441465	Upregulated
XP_024304726.1	rac GTPase-activating protein 1 isoform X1 [Homo sapiens]	1.619	8.32722e-05	Upregulated
NP_002209.2	inter-alpha-trypsin inhibitor heavy chain H4 isoform 1 precursor [Homo sapiens]	4.53872	0.0209984	Upregulated
XP_005250580.1	exocyst complex component 4 isoform X2 [Homo sapiens]	4.18644	0.0359099	Upregulated
NP_004144.2	origin recognition complex subunit 1 isoform 1 [Homo sapiens]	1.55224	0.0447902	Upregulated
NP_057550.3	ankyrin repeat domain-containing protein 39 [Homo sapiens]	2.21711	0.0348308	Upregulated
XP_016873759.1	neuroblast differentiation-associated protein AHNAK isoform X2 [Homo sapiens]	0.590034	0.0265808	Downregulated
NP_000282.1	phosphoglycerate kinase 1 [Homo sapiens]	0.611665	0.00106572	Downregulated
NP_001302466.1	L-lactate dehydrogenase B chain isoform LDHBx [Homo sapiens]	0.617024	0.00213593	Downregulated
NP_942131.1	acetyl-CoA carboxylase 1 isoform 1 [Homo sapiens]	0.616543	0.0403916	Downregulated
NP_002970.2	sterol carrier protein 2 isoform 1 precursor [Homo sapiens]	0.55553	0.0390552	Downregulated
XP_024308119.1	long-chain-fatty-acid--CoA ligase 4 isoform X1 [Homo sapiens]	0.372275	0.018191	Downregulated
NP_001139247.1	peptidyl-prolyl cis-trans isomerase FKBP5 isoform 1 [Homo sapiens]	0.411315	0.0183979	Downregulated
NP_066952.1	inorganic pyrophosphatase [Homo sapiens]	0.646525	0.00579537	Downregulated
NP_001619.1	aldo-keto reductase family 1 member B1 isoform 1 [Homo sapiens]	0.554873	0.0368018	Downregulated
NP_006296.1	acidic leucine-rich nuclear phosphoprotein 32 family member A [Homo sapiens]	0.658564	0.0479574	Downregulated
NP_002952.1	protein S100-A4 [Homo sapiens]	0.382067	0.0138776	Downregulated
NP_001288196.1	metallothionein-1G isoform 2 [Homo sapiens]	0.164174	0.0120964	Downregulated
NP_001349703.1	uridine phosphorylase 1 isoform a [Homo sapiens]	0.563678	0.0101181	Downregulated
NP_005309.1	histone H1.0 [Homo sapiens]	0.492316	7.87447e-05	Downregulated
NP_057366.2	GTP:AMP phosphotransferase AK3, mitochondrial isoform a [Homo sapiens]	0.601112	0.0231605	Downregulated
NP_064695.3	aldo-keto reductase family 1 member B10 [Homo sapiens]	0.629722	0.00974568	Downregulated
XP_005268733.1	keratin, type II cytoskeletal 80 isoform X1 [Homo sapiens]	0.516265	0.0253838	Downregulated

## Sheet: 2hr
Protien Accession	Description	Fold change	p-value
NP_001407.1	eukaryotic initiation factor 4A-I isoform 1 [Homo sapiens]	1.54324	0.0169938	Upregulated
NP_006112.3	keratin, type II cytoskeletal 1 [Homo sapiens]	2.07568	0.00869875	Upregulated
NP_006133.1	14-3-3 protein sigma [Homo sapiens]	1.8317	0.00350136	Upregulated
NP_001366295.1	keratin, type I cytoskeletal 10 isoform 2 [Homo sapiens]	2.19649	0.00676544	Upregulated
NP_005902.1	S-adenosylmethionine synthase isoform type-2 [Homo sapiens]	1.7296	0.0135395	Upregulated
NP_001273201.1	translationally-controlled tumor protein isoform 1 [Homo sapiens]	1.52365	0.000447376	Upregulated
XP_006719119.1	alpha-2-macroglobulin isoform X1 [Homo sapiens]	4.16702	0.010964	Upregulated
NP_000415.2	keratin, type II cytoskeletal 5 [Homo sapiens]	2.28276	0.0292784	Upregulated
NP_001159403.1	ribonucleoside-diphosphate reductase subunit M2 isoform 1 [Homo sapiens]	1.73647	0.0034907	Upregulated
NP_001124295.1	DNA (cytosine-5)-methyltransferase 1 isoform a [Homo sapiens]	2.10199	0.0178959	Upregulated
NP_000549.1	hemoglobin subunit alpha [Homo sapiens]	2.00282	0.0121788	Upregulated
NP_003146.1	stanniocalcin-1 precursor [Homo sapiens]	2.38102	0.0129555	Upregulated
NP_002209.2	inter-alpha-trypsin inhibitor heavy chain H4 isoform 1 precursor [Homo sapiens]	4.051	0.0140754	Upregulated
XP_005250580.1	exocyst complex component 4 isoform X2 [Homo sapiens]	4.77812	0.0419023	Upregulated
NP_057550.3	ankyrin repeat domain-containing protein 39 [Homo sapiens]	2.43091	0.0188639	Upregulated
XP_047293297.1	F-box only protein 15 isoform X3 [Homo sapiens]	2.06646	0.0119797	Upregulated
XP_016873759.1	neuroblast differentiation-associated protein AHNAK isoform X2 [Homo sapiens]	0.586065	0.0325242	Downregulated
NP_000282.1	phosphoglycerate kinase 1 [Homo sapiens]	0.609833	0.000271219	Downregulated
NP_001302466.1	L-lactate dehydrogenase B chain isoform LDHBx [Homo sapiens]	0.659816	0.00629429	Downregulated
NP_942131.1	acetyl-CoA carboxylase 1 isoform 1 [Homo sapiens]	0.648105	0.0492529	Downregulated
NP_478059.1	phosphoserine aminotransferase isoform 1 [Homo sapiens]	0.579182	0.000252949	Downregulated
NP_002970.2	sterol carrier protein 2 isoform 1 precursor [Homo sapiens]	0.533427	0.0340439	Downregulated
NP_001165131.1	NADH-cytochrome b5 reductase 3 isoform 3 [Homo sapiens]	0.581857	0.0453105	Downregulated
XP_024308119.1	long-chain-fatty-acid--CoA ligase 4 isoform X1 [Homo sapiens]	0.387411	0.0213028	Downregulated
XP_011512374.1	succinate dehydrogenase [ubiquinone] flavoprotein subunit, mitochondrial isoform X1 [Homo sapiens]	0.585118	0.0152434	Downregulated
NP_001229766.1	AP-2 complex subunit alpha-2 isoform 1 [Homo sapiens]	0.599653	0.0345241	Downregulated
NP_001139247.1	peptidyl-prolyl cis-trans isomerase FKBP5 isoform 1 [Homo sapiens]	0.449949	0.0211348	Downregulated
NP_066952.1	inorganic pyrophosphatase [Homo sapiens]	0.623833	0.00387821	Downregulated
NP_001619.1	aldo-keto reductase family 1 member B1 isoform 1 [Homo sapiens]	0.451096	0.0257093	Downregulated
NP_006296.1	acidic leucine-rich nuclear phosphoprotein 32 family member A [Homo sapiens]	0.604305	0.0293332	Downregulated
NP_002952.1	protein S100-A4 [Homo sapiens]	0.419044	0.0137482	Downregulated
NP_001288196.1	metallothionein-1G isoform 2 [Homo sapiens]	0.0864365	0.0105086	Downregulated
NP_001349703.1	uridine phosphorylase 1 isoform a [Homo sapiens]	0.558556	0.00844233	Downregulated
NP_005309.1	histone H1.0 [Homo sapiens]	0.549826	0.000546554	Downregulated
NP_008817.1	ATP synthase subunit epsilon, mitochondrial [Homo sapiens]	0.643422	0.0369031	Downregulated
NP_057366.2	GTP:AMP phosphotransferase AK3, mitochondrial isoform a [Homo sapiens]	0.65379	0.024333	Downregulated
XP_005268733.1	keratin, type II cytoskeletal 80 isoform X1 [Homo sapiens]	0.451438	0.0174741	Downregulated

## Sheet: 1hr
Protien Accession	Description	Fold change	p-value
NP_006112.3	keratin, type II cytoskeletal 1 [Homo sapiens]	1.54037	0.0103199	Upregulated
NP_001058.2	DNA topoisomerase 2-alpha [Homo sapiens]	1.52207	0.0410048	Upregulated
NP_006133.1	14-3-3 protein sigma [Homo sapiens]	2.11259	0.000661499	Upregulated
NP_005902.1	S-adenosylmethionine synthase isoform type-2 [Homo sapiens]	1.84211	0.0122623	Upregulated
XP_047282915.1	caprin-1 isoform X1 [Homo sapiens]	1.50527	0.00213992	Upregulated
NP_001307540.1	importin subunit alpha-1 [Homo sapiens]	2.20296	0.0320927	Upregulated
XP_006719119.1	alpha-2-macroglobulin isoform X1 [Homo sapiens]	3.55601	0.00595563	Upregulated
NP_001159403.1	ribonucleoside-diphosphate reductase subunit M2 isoform 1 [Homo sapiens]	1.75991	0.000434974	Upregulated
NP_001124295.1	DNA (cytosine-5)-methyltransferase 1 isoform a [Homo sapiens]	1.73965	0.00921964	Upregulated
NP_000549.1	hemoglobin subunit alpha [Homo sapiens]	1.92818	0.0120059	Upregulated
NP_003146.1	stanniocalcin-1 precursor [Homo sapiens]	2.32997	0.0145749	Upregulated
XP_024304726.1	rac GTPase-activating protein 1 isoform X1 [Homo sapiens]	1.54368	0.000284443	Upregulated
NP_002209.2	inter-alpha-trypsin inhibitor heavy chain H4 isoform 1 precursor [Homo sapiens]	3.696	0.00806648	Upregulated
XP_005250580.1	exocyst complex component 4 isoform X2 [Homo sapiens]	2.69829	0.0207992	Upregulated
NP_057550.3	ankyrin repeat domain-containing protein 39 [Homo sapiens]	2.06855	0.0460079	Upregulated
XP_016873759.1	neuroblast differentiation-associated protein AHNAK isoform X2 [Homo sapiens]	0.590034	0.0265808	Downregulated
NP_942131.1	acetyl-CoA carboxylase 1 isoform 1 [Homo sapiens]	0.632044	0.0435309	Downregulated
NP_478059.1	phosphoserine aminotransferase isoform 1 [Homo sapiens]	0.551154	0.000656922	Downregulated
XP_024308119.1	long-chain-fatty-acid--CoA ligase 4 isoform X1 [Homo sapiens]	0.415795	0.0221747	Downregulated
NP_001139247.1	peptidyl-prolyl cis-trans isomerase FKBP5 isoform 1 [Homo sapiens]	0.440432	0.0210998	Downregulated
NP_002952.1	protein S100-A4 [Homo sapiens]	0.592108	0.0319468	Downregulated
NP_001288196.1	metallothionein-1G isoform 2 [Homo sapiens]	0.211274	0.0135156	Downregulated
NP_005309.1	histone H1.0 [Homo sapiens]	0.524472	0.000190235	Downregulated
NP_057366.2	GTP:AMP phosphotransferase AK3, mitochondrial isoform a [Homo sapiens]	0.662009	0.0286806	Downregulated

## Sheet: 30min
Protien Accession	Description	Fold change	p-value
NP_001407.1	eukaryotic initiation factor 4A-I isoform 1 [Homo sapiens]	1.52505	0.0316488	Upregulated
NP_001307526.1	probable ATP-dependent RNA helicase DDX5 isoform b [Homo sapiens]	1.51183	0.00096496	Upregulated
NP_006112.3	keratin, type II cytoskeletal 1 [Homo sapiens]	1.51966	0.00603884	Upregulated
NP_112420.1	heterogeneous nuclear ribonucleoprotein A1 isoform b [Homo sapiens]	1.54982	0.0442804	Upregulated
NP_001058.2	DNA topoisomerase 2-alpha [Homo sapiens]	1.91289	0.0129493	Upregulated
NP_001366295.1	keratin, type I cytoskeletal 10 isoform 2 [Homo sapiens]	1.58408	0.0255968	Upregulated
NP_005902.1	S-adenosylmethionine synthase isoform type-2 [Homo sapiens]	1.77407	0.0144837	Upregulated
XP_047282915.1	caprin-1 isoform X1 [Homo sapiens]	1.59237	0.00221772	Upregulated
NP_001530.1	dnaJ homolog subfamily A member 1 isoform 1 [Homo sapiens]	1.57446	0.0405053	Upregulated
XP_005270360.1	cyclin-dependent kinase 1 isoform X1 [Homo sapiens]	1.72008	0.0484862	Upregulated
NP_001159403.1	ribonucleoside-diphosphate reductase subunit M2 isoform 1 [Homo sapiens]	1.93617	0.00105847	Upregulated
NP_001124295.1	DNA (cytosine-5)-methyltransferase 1 isoform a [Homo sapiens]	2.19693	0.0177383	Upregulated
XP_011526999.1	targeting protein for Xklp2 isoform X1 [Homo sapiens]	1.69576	0.0452416	Upregulated
NP_000549.1	hemoglobin subunit alpha [Homo sapiens]	2.09903	0.0135437	Upregulated
NP_003146.1	stanniocalcin-1 precursor [Homo sapiens]	3.57627	0.00693095	Upregulated
XP_024304726.1	rac GTPase-activating protein 1 isoform X1 [Homo sapiens]	1.77658	0.00106766	Upregulated
XP_016856050.1	alpha-taxilin isoform X1 [Homo sapiens]	1.52924	0.0384035	Upregulated
XP_005250580.1	exocyst complex component 4 isoform X2 [Homo sapiens]	1.78034	0.0486554	Upregulated
NP_057550.3	ankyrin repeat domain-containing protein 39 [Homo sapiens]	2.35656	0.0278722	Upregulated
XP_016873759.1	neuroblast differentiation-associated protein AHNAK isoform X2 [Homo sapiens]	0.549485	0.0257542	Downregulated
NP_000282.1	phosphoglycerate kinase 1 [Homo sapiens]	0.532483	0.000309671	Downregulated
NP_004095.4	fatty acid synthase [Homo sapiens]	0.652989	0.0459584	Downregulated
NP_942131.1	acetyl-CoA carboxylase 1 isoform 1 [Homo sapiens]	0.619698	0.0410459	Downregulated
NP_899199.2	asparagine synthetase [glutamine-hydrolyzing] isoform a [Homo sapiens]	0.646654	0.0494075	Downregulated
NP_478059.1	phosphoserine aminotransferase isoform 1 [Homo sapiens]	0.526303	0.000339968	Downregulated
XP_024308119.1	long-chain-fatty-acid--CoA ligase 4 isoform X1 [Homo sapiens]	0.370125	0.0191806	Downregulated
NP_001139247.1	peptidyl-prolyl cis-trans isomerase FKBP5 isoform 1 [Homo sapiens]	0.417646	0.0168521	Downregulated
NP_001619.1	aldo-keto reductase family 1 member B1 isoform 1 [Homo sapiens]	0.5313	0.0337557	Downregulated
NP_002952.1	protein S100-A4 [Homo sapiens]	0.386835	0.0136524	Downregulated
NP_001288196.1	metallothionein-1G isoform 2 [Homo sapiens]	0.190956	0.0133684	Downregulated
NP_001349703.1	uridine phosphorylase 1 isoform a [Homo sapiens]	0.562644	0.0108483	Downregulated
NP_005309.1	histone H1.0 [Homo sapiens]	0.569409	6.52019e-05	Downregulated
NP_036344.2	prostaglandin reductase 1 isoform 1 [Homo sapiens]	0.60451	0.01802	Downregulated
NP_057366.2	GTP:AMP phosphotransferase AK3, mitochondrial isoform a [Homo sapiens]	0.557223	0.0196016	Downregulated
NP_064695.3	aldo-keto reductase family 1 member B10 [Homo sapiens]	0.62273	0.00546771	Downregulated
XP_005268733.1	keratin, type II cytoskeletal 80 isoform X1 [Homo sapiens]	0.568597	0.0383317	Downregulated

## Sheet: 15min
Protien Accession	Description	Fold change	p-value
NP_001058.2	DNA topoisomerase 2-alpha [Homo sapiens]	1.90555	0.0106436	Upregulated
NP_001366295.1	keratin, type I cytoskeletal 10 isoform 2 [Homo sapiens]	1.56407	0.0164121	Upregulated
NP_005902.1	S-adenosylmethionine synthase isoform type-2 [Homo sapiens]	1.77489	0.0126884	Upregulated
XP_047282915.1	caprin-1 isoform X1 [Homo sapiens]	1.59685	0.00340436	Upregulated
NP_001530.1	dnaJ homolog subfamily A member 1 isoform 1 [Homo sapiens]	1.57265	0.0346967	Upregulated
NP_001307540.1	importin subunit alpha-1 [Homo sapiens]	2.43451	0.0411629	Upregulated
XP_005270360.1	cyclin-dependent kinase 1 isoform X1 [Homo sapiens]	1.85861	0.0374805	Upregulated
NP_001159403.1	ribonucleoside-diphosphate reductase subunit M2 isoform 1 [Homo sapiens]	1.95968	0.000319725	Upregulated
NP_001124295.1	DNA (cytosine-5)-methyltransferase 1 isoform a [Homo sapiens]	2.26699	0.0196317	Upregulated
NP_000549.1	hemoglobin subunit alpha [Homo sapiens]	2.97303	0.0332543	Upregulated
NP_003146.1	stanniocalcin-1 precursor [Homo sapiens]	3.49779	0.00364939	Upregulated
XP_024304726.1	rac GTPase-activating protein 1 isoform X1 [Homo sapiens]	1.74375	0.000990258	Upregulated
XP_016856050.1	alpha-taxilin isoform X1 [Homo sapiens]	1.5477	0.035895	Upregulated
NP_002209.2	inter-alpha-trypsin inhibitor heavy chain H4 isoform 1 precursor [Homo sapiens]	2.1645	0.019941	Upregulated
XP_005250580.1	exocyst complex component 4 isoform X2 [Homo sapiens]	1.91162	0.0495162	Upregulated
NP_004144.2	origin recognition complex subunit 1 isoform 1 [Homo sapiens]	1.61554	0.0411717	Upregulated
NP_057550.3	ankyrin repeat domain-containing protein 39 [Homo sapiens]	2.26184	0.0291352	Upregulated
XP_016873759.1	neuroblast differentiation-associated protein AHNAK isoform X2 [Homo sapiens]	0.541509	0.0225029	Downregulated
NP_001193943.1	serpin H1 precursor [Homo sapiens]	0.667701	0.000122432	Downregulated
NP_000282.1	phosphoglycerate kinase 1 [Homo sapiens]	0.549127	0.000384187	Downregulated
NP_004095.4	fatty acid synthase [Homo sapiens]	0.630254	0.0355237	Downregulated
NP_942131.1	acetyl-CoA carboxylase 1 isoform 1 [Homo sapiens]	0.610298	0.0383635	Downregulated
NP_478059.1	phosphoserine aminotransferase isoform 1 [Homo sapiens]	0.514166	0.000342783	Downregulated
XP_024308119.1	long-chain-fatty-acid--CoA ligase 4 isoform X1 [Homo sapiens]	0.365547	0.0190108	Downregulated
NP_001139247.1	peptidyl-prolyl cis-trans isomerase FKBP5 isoform 1 [Homo sapiens]	0.413434	0.0171403	Downregulated
NP_001619.1	aldo-keto reductase family 1 member B1 isoform 1 [Homo sapiens]	0.566243	0.0405126	Downregulated
NP_002952.1	protein S100-A4 [Homo sapiens]	0.374027	0.0131055	Downregulated
NP_001288196.1	metallothionein-1G isoform 2 [Homo sapiens]	0.206319	0.0134835	Downregulated
NP_001349703.1	uridine phosphorylase 1 isoform a [Homo sapiens]	0.547338	0.00803937	Downregulated
NP_005309.1	histone H1.0 [Homo sapiens]	0.588725	0.00018398	Downregulated
NP_036344.2	prostaglandin reductase 1 isoform 1 [Homo sapiens]	0.642344	0.0206154	Downregulated
NP_057366.2	GTP:AMP phosphotransferase AK3, mitochondrial isoform a [Homo sapiens]	0.551535	0.0169128	Downregulated
NP_064695.3	aldo-keto reductase family 1 member B10 [Homo sapiens]	0.608125	0.00894148	Downregulated
XP_005268733.1	keratin, type II cytoskeletal 80 isoform X1 [Homo sapiens]	0.530811	0.027899	Downregulated

## Sheet: 5min
Protien Accession	Description	Fold change	p-value
NP_001407.1	eukaryotic initiation factor 4A-I isoform 1 [Homo sapiens]	1.57066	0.0263144	Upregulated
NP_006112.3	keratin, type II cytoskeletal 1 [Homo sapiens]	1.53265	0.00970392	Upregulated
NP_001058.2	DNA topoisomerase 2-alpha [Homo sapiens]	1.81628	0.0139931	Upregulated
NP_001366295.1	keratin, type I cytoskeletal 10 isoform 2 [Homo sapiens]	1.76388	0.00719519	Upregulated
NP_005902.1	S-adenosylmethionine synthase isoform type-2 [Homo sapiens]	1.73012	0.0128853	Upregulated
NP_001530.1	dnaJ homolog subfamily A member 1 isoform 1 [Homo sapiens]	1.62934	0.0329548	Upregulated
XP_006719119.1	alpha-2-macroglobulin isoform X1 [Homo sapiens]	2.07674	0.0174563	Upregulated
NP_001159403.1	ribonucleoside-diphosphate reductase subunit M2 isoform 1 [Homo sapiens]	1.97844	9.16e-05	Upregulated
NP_001124295.1	DNA (cytosine-5)-methyltransferase 1 isoform a [Homo sapiens]	2.08189	0.0331026	Upregulated
NP_003146.1	stanniocalcin-1 precursor [Homo sapiens]	1.96642	0.0179093	Upregulated
XP_024304726.1	rac GTPase-activating protein 1 isoform X1 [Homo sapiens]	1.63332	0.00975763	Upregulated
XP_005250580.1	exocyst complex component 4 isoform X2 [Homo sapiens]	3.14112	0.0339525	Upregulated
NP_057550.3	ankyrin repeat domain-containing protein 39 [Homo sapiens]	2.25869	0.0279341	Upregulated
XP_047293297.1	F-box only protein 15 isoform X3 [Homo sapiens]	1.63776	0.00320579	Upregulated
XP_016873759.1	neuroblast differentiation-associated protein AHNAK isoform X2 [Homo sapiens]	0.663247	0.0400326	Downregulated
NP_000282.1	phosphoglycerate kinase 1 [Homo sapiens]	0.498687	3.46e-05	Downregulated
NP_000691.1	annexin A1 [Homo sapiens]	0.605774	0.0380239	Downregulated
NP_478059.1	phosphoserine aminotransferase isoform 1 [Homo sapiens]	0.623508	0.000373849	Downregulated
NP_001158886.1	L-lactate dehydrogenase A chain isoform 3 [Homo sapiens]	0.657583	0.0482924	Downregulated
XP_024308119.1	long-chain-fatty-acid--CoA ligase 4 isoform X1 [Homo sapiens]	0.484416	0.0279323	Downregulated
XP_011512374.1	succinate dehydrogenase [ubiquinone] flavoprotein subunit, mitochondrial isoform X1 [Homo sapiens]	0.636476	0.0229508	Downregulated
NP_001229766.1	AP-2 complex subunit alpha-2 isoform 1 [Homo sapiens]	0.584824	0.0306543	Downregulated
NP_001139247.1	peptidyl-prolyl cis-trans isomerase FKBP5 isoform 1 [Homo sapiens]	0.525533	0.0231247	Downregulated
NP_001619.1	aldo-keto reductase family 1 member B1 isoform 1 [Homo sapiens]	0.501791	0.0297444	Downregulated
NP_006296.1	acidic leucine-rich nuclear phosphoprotein 32 family member A [Homo sapiens]	0.541595	0.015861	Downregulated
NP_002952.1	protein S100-A4 [Homo sapiens]	0.451133	0.0171138	Downregulated
NP_001288196.1	metallothionein-1G isoform 2 [Homo sapiens]	0.231781	0.0124178	Downregulated
NP_001349703.1	uridine phosphorylase 1 isoform a [Homo sapiens]	0.522156	0.0130778	Downregulated
NP_005309.1	histone H1.0 [Homo sapiens]	0.517847	0.00069522	Downregulated
NP_057366.2	GTP:AMP phosphotransferase AK3, mitochondrial isoform a [Homo sapiens]	0.582546	0.0237199	Downregulated
XP_005268733.1	keratin, type II cytoskeletal 80 isoform X1 [Homo sapiens]	0.529396	0.0287943	Downregulated

## Sheet: 2min
Protien Accession	Description	Fold change	p-value
NP_001407.1	eukaryotic initiation factor 4A-I isoform 1 [Homo sapiens]	1.54694	0.0285114	Upregulated
NP_006112.3	keratin, type II cytoskeletal 1 [Homo sapiens]	1.74299	0.013143	Upregulated
NP_001058.2	DNA topoisomerase 2-alpha [Homo sapiens]	2.03711	0.0208534	Upregulated
NP_001366295.1	keratin, type I cytoskeletal 10 isoform 2 [Homo sapiens]	1.79579	0.00159403	Upregulated
NP_005902.1	S-adenosylmethionine synthase isoform type-2 [Homo sapiens]	1.61031	0.0261409	Upregulated
NP_001530.1	dnaJ homolog subfamily A member 1 isoform 1 [Homo sapiens]	1.75788	0.0306942	Upregulated
XP_006719119.1	alpha-2-macroglobulin isoform X1 [Homo sapiens]	1.73768	0.055883	Upregulated
NP_001159403.1	ribonucleoside-diphosphate reductase subunit M2 isoform 1 [Homo sapiens]	1.90238	4.94166e-05	Upregulated
NP_001124295.1	DNA (cytosine-5)-methyltransferase 1 isoform a [Homo sapiens]	2.34449	0.0116629	Upregulated
NP_003146.1	stanniocalcin-1 precursor [Homo sapiens]	1.85671	0.0237194	Upregulated
XP_024304726.1	rac GTPase-activating protein 1 isoform X1 [Homo sapiens]	1.48359	0.0163186	Upregulated
XP_005250580.1	exocyst complex component 4 isoform X2 [Homo sapiens]	5.35275	0.0372381	Upregulated
NP_057550.3	ankyrin repeat domain-containing protein 39 [Homo sapiens]	2.32697	0.109442	Upregulated
XP_047293297.1	F-box only protein 15 isoform X3 [Homo sapiens]	2.28789	0.0291303	Upregulated
XP_016873759.1	neuroblast differentiation-associated protein AHNAK isoform X2 [Homo sapiens]	0.664946	0.0447945	Downregulated
XP_016882820.1	alpha-actinin-4 isoform X3 [Homo sapiens]	0.647943	0.00924143	Downregulated
NP_006752.1	14-3-3 protein epsilon [Homo sapiens]	0.655478	0.0307807	Downregulated
NP_000282.1	phosphoglycerate kinase 1 [Homo sapiens]	0.461833	0.000323768	Downregulated
NP_001072989.1	kinectin isoform a [Homo sapiens]	0.657814	0.0233414	Downregulated
NP_006746.1	transaldolase [Homo sapiens]	0.645234	0.00451224	Downregulated
NP_478059.1	phosphoserine aminotransferase isoform 1 [Homo sapiens]	0.542635	0.000266188	Downregulated
NP_001158886.1	L-lactate dehydrogenase A chain isoform 3 [Homo sapiens]	0.629242	0.038633	Downregulated
XP_047301904.1	macrophage-capping protein isoform X1 [Homo sapiens]	0.662189	0.00198811	Downregulated
NP_001165131.1	NADH-cytochrome b5 reductase 3 isoform 3 [Homo sapiens]	0.551217	0.0362445	Downregulated
XP_024308119.1	long-chain-fatty-acid--CoA ligase 4 isoform X1 [Homo sapiens]	0.449698	0.0276472	Downregulated
XP_011512374.1	succinate dehydrogenase [ubiquinone] flavoprotein subunit, mitochondrial isoform X1 [Homo sapiens]	0.624036	0.0239302	Downregulated
NP_001229766.1	AP-2 complex subunit alpha-2 isoform 1 [Homo sapiens]	0.437639	0.0140569	Downregulated
NP_002624.2	phosphoglucomutase-1 isoform 1 [Homo sapiens]	0.563947	0.0488068	Downregulated
NP_006139.1	LIM and SH3 domain protein 1 isoform a [Homo sapiens]	0.658172	0.0495403	Downregulated
NP_006747.1	transcription elongation factor A protein 1 isoform 1 [Homo sapiens]	0.664209	0.0465856	Downregulated
NP_001139247.1	peptidyl-prolyl cis-trans isomerase FKBP5 isoform 1 [Homo sapiens]	0.532869	0.0240374	Downregulated
NP_066952.1	inorganic pyrophosphatase [Homo sapiens]	0.65342	0.00331963	Downregulated
NP_001619.1	aldo-keto reductase family 1 member B1 isoform 1 [Homo sapiens]	0.378322	0.0233998	Downregulated
NP_001303303.1	malate dehydrogenase, peroxisomal isoform MDH1x [Homo sapiens]	0.666275	0.0263114	Downregulated
NP_006296.1	acidic leucine-rich nuclear phosphoprotein 32 family member A [Homo sapiens]	0.469705	0.0167652	Downregulated
NP_002952.1	protein S100-A4 [Homo sapiens]	0.399869	0.0130023	Downregulated
NP_112576.1	SH3 domain-binding glutamic acid-rich-like protein 3 [Homo sapiens]	0.590464	0.00315268	Downregulated
XP_005253288.1	CD44 antigen isoform X1 [Homo sapiens]	0.64969	0.00819447	Downregulated
NP_001288196.1	metallothionein-1G isoform 2 [Homo sapiens]	0.137657	0.0113292	Downregulated
NP_001349703.1	uridine phosphorylase 1 isoform a [Homo sapiens]	0.410337	0.00469597	Downregulated
NP_000091.1	cystatin-B [Homo sapiens]	0.499705	0.00375685	Downregulated
XP_047286017.1	peptidyl-prolyl cis-trans isomerase E isoform X1 [Homo sapiens]	0.560505	0.00763988	Downregulated
XP_011526206.1	DAZ-associated protein 1 isoform X2 [Homo sapiens]	0.653936	0.039594	Downregulated
NP_005309.1	histone H1.0 [Homo sapiens]	0.633896	0.00602202	Downregulated
NP_008817.1	ATP synthase subunit epsilon, mitochondrial [Homo sapiens]	0.586953	0.0237114	Downregulated
NP_002296.1	galectin-1 [Homo sapiens]	0.556875	0.0125681	Downregulated
NP_009144.1	PRA1 family protein 2 [Homo sapiens]	0.550552	0.0408861	Downregulated
NP_057366.2	GTP:AMP phosphotransferase AK3, mitochondrial isoform a [Homo sapiens]	0.636653	0.0324591	Downregulated
NP_002406.1	macrophage migration inhibitory factor [Homo sapiens]	0.558505	0.0471819	Downregulated
NP_001189476.1	SYNJ2BP-COX16 protein isoform 1 [Homo sapiens]	0.553682	0.0402515	Downregulated
XP_005253871.1	CD9 antigen isoform X1 [Homo sapiens]	0.667641	0.044982	Downregulated
XP_005268733.1	keratin, type II cytoskeletal 80 isoform X1 [Homo sapiens]	0.399923	0.0144921	Downregulated
