# Supplementary material for: Proteomic analysis reveals anticancer mechanisms of Bhallataka taila in inhibiting lung cancer progression and metastasis
Source: Royal Society of Chemistry journal article supplement (doi:10.1039/d4mo00156g), 2025-01-02
Supplement: d4mo00156g4.pdf [file d4mo00156g4.pdf]

**Supplementary table 2:** List of number of dysregulated proteins at various timepoints after Bhallataka taila treatment in A549 cells

| <b>Time points</b> | <b>Differentially expressed proteins</b> | <b>Upregulated</b> | <b>Downregulated</b> |
|--------------------|------------------------------------------|--------------------|----------------------|
| 48hr               | 114                                      | 37                 | 77                   |
| 24hr               | 55                                       | 19                 | 36                   |
| 12hr               | 38                                       | 21                 | 17                   |
| 2hr                | 37                                       | 16                 | 21                   |
| 1hr                | 24                                       | 15                 | 9                    |
| 30min              | 36                                       | 19                 | 17                   |
| 15min              | 34                                       | 17                 | 17                   |
| 5min               | 31                                       | 14                 | 17                   |
| 2min               | 53                                       | 15                 | 38                   |
