# Supplementary material for: Proteomic analysis reveals anticancer mechanisms of Bhallataka taila in inhibiting lung cancer progression and metastasis
Source: Royal Society of Chemistry journal article supplement (doi:10.1039/d4mo00156g), 2025-01-02
Supplement: d4mo00156g5.pdf [file d4mo00156g5.pdf]

**Supplementary table 3: List of top 10 dysregulated hub genes ranked by network string interactions**

| <b>Rank</b> | <b>Name</b> | <b>Score</b> |
|-------------|-------------|--------------|
| 1           | PFN1        | 11           |
| 2           | PPIA        | 9            |
| 3           | ANXA5       | 8            |
| 3           | YWHAZ       | 8            |
| 3           | CD44        | 8            |
| 6           | RBMX        | 7            |
| 6           | RPS28       | 7            |
| 8           | SNRPA       | 6            |
| 8           | STMN1       | 6            |
| 8           | MIF         | 6            |
