# Supplementary figures and images for: Proteomic analysis reveals anticancer mechanisms of Bhallataka taila in inhibiting lung cancer progression and metastasis
Source: Royal Society of Chemistry journal article supplement (doi:10.1039/d4mo00156g), 2025-01-02

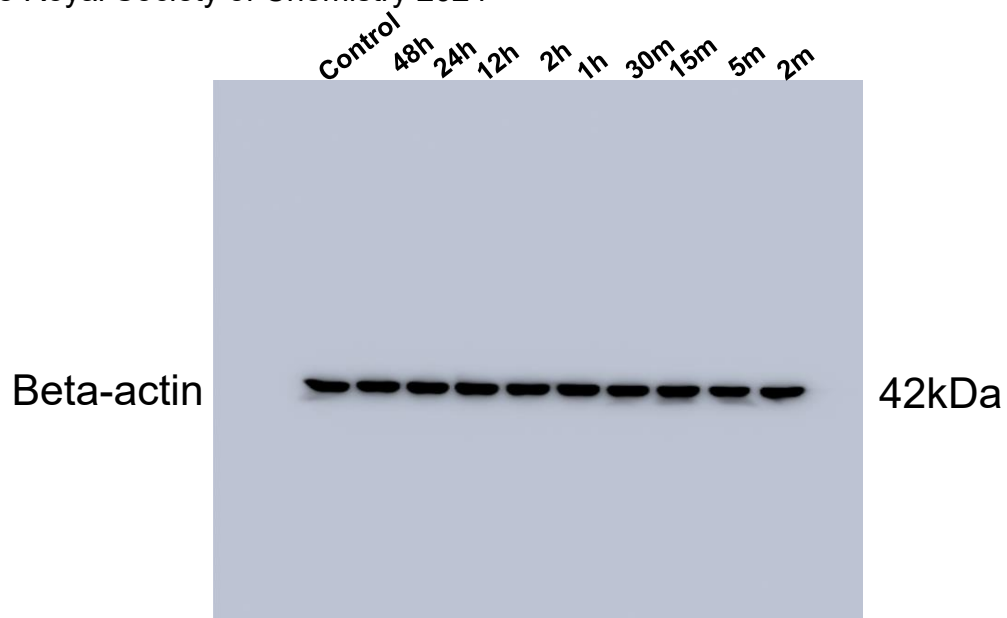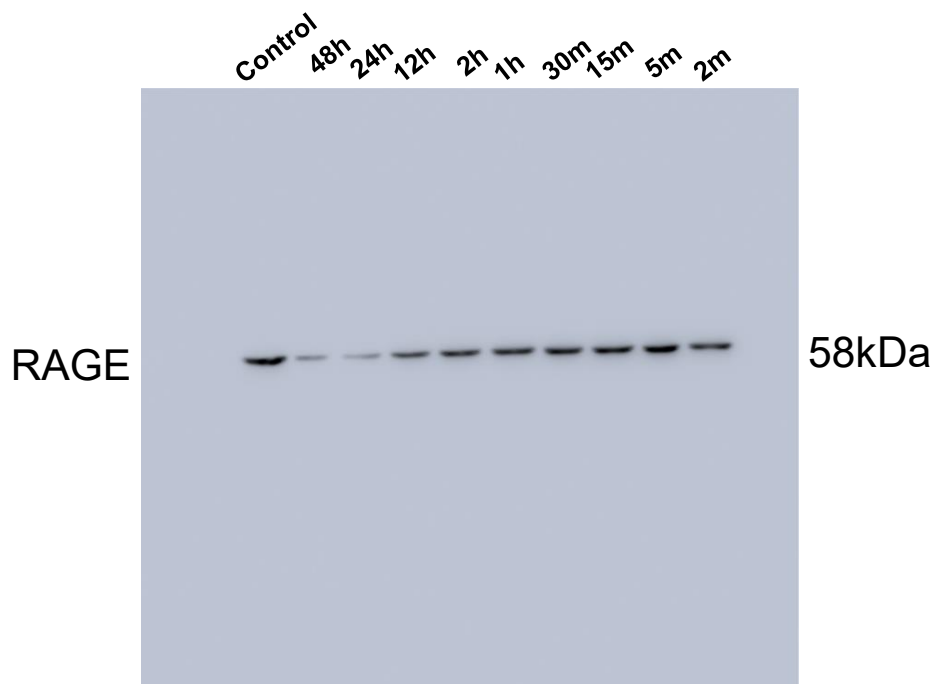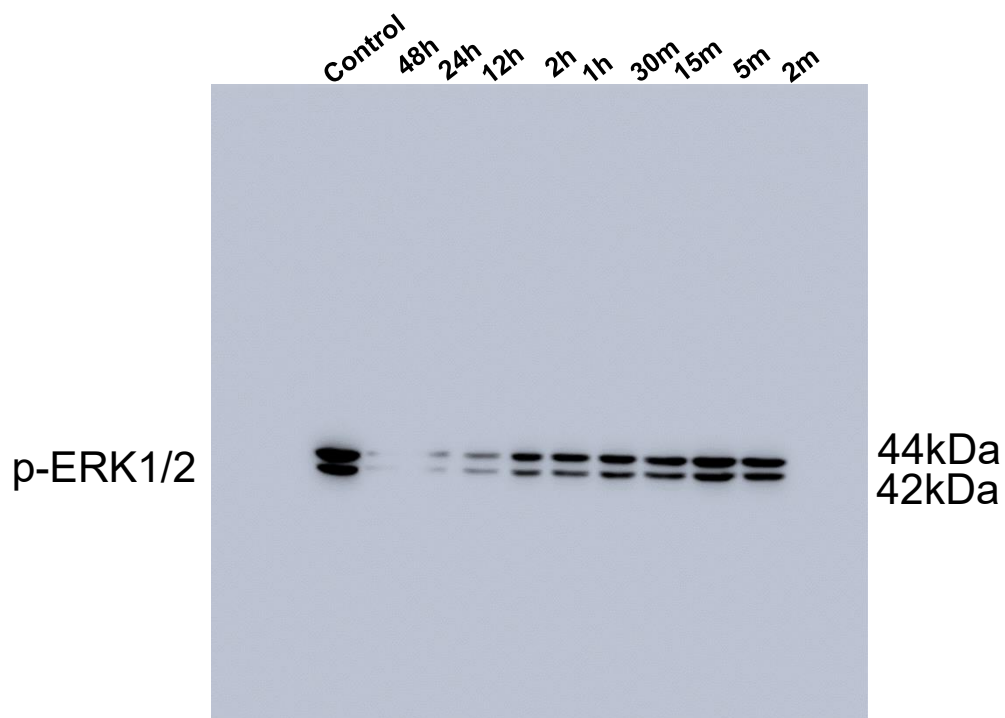

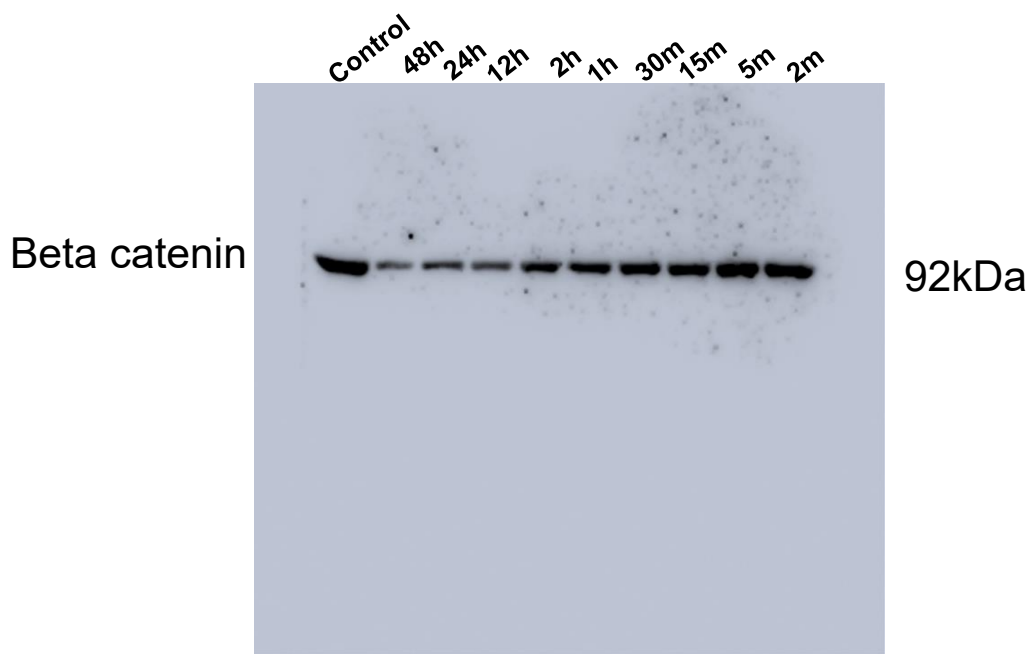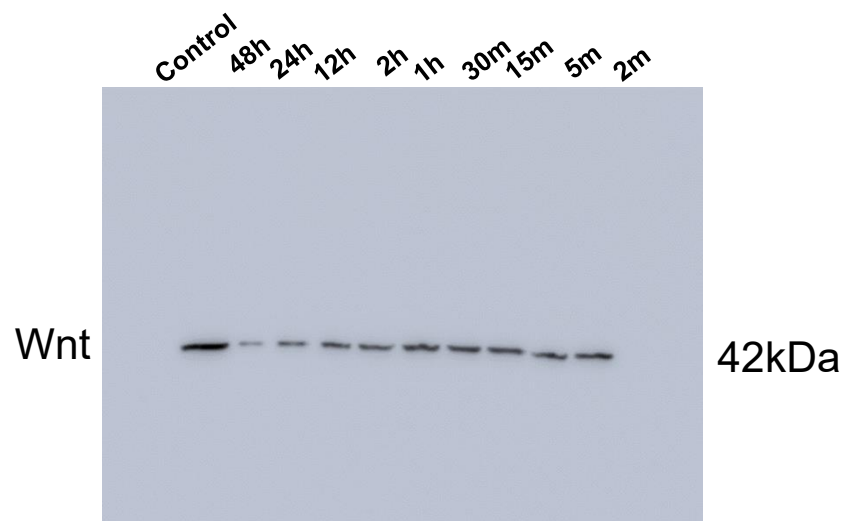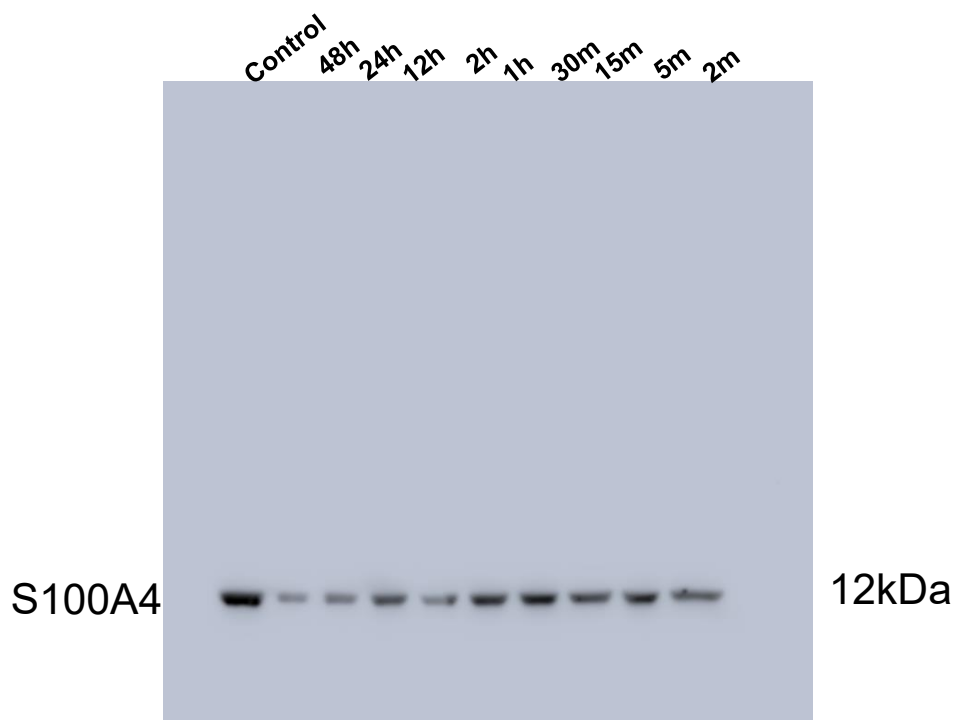

Supplement: d4mo00156g1.pdf [file d4mo00156g1.pdf]
